# Supplementary material
Source: PubMed Central journal article supplement (PMC6277257)
Supplement: NIHMS998384-supplement-Supplemental_Material.pdf [file NIHMS998384-supplement-Supplemental_Material.pdf]

**Supplemental Table 1: Distribution of fracture site of males with Duchenne muscular dystrophy from MD STARnet 2002-2011**

|                      | First Fracture         | All Fractures |
|----------------------|------------------------|---------------|
| Total, n             | 251 (100) <sup>1</sup> | 455 (100)     |
| Spine, n             | 11 (4.4)               | 32 (7)        |
| Humerus, n           | 26 (10.4)              | 54 (11.9)     |
| Wrist, n             | 6 (2.4)                | 9 (2)         |
| Arm <sup>2</sup> , n | 11 (4.4)               | 15 (3.3)      |
| Femur, n             | 84 (33.5)              | 147 (32.3)    |
| Tibia/Fibula, n      | 34 (13.5)              | 67 (14.7)     |
| Foot, n              | 13 (5.2)               | 18 (4)        |
| Ankle, n             | 15 (6)                 | 28 (6.2)      |
| Leg <sup>2</sup> , n | 9 (3.6)                | 19 (4.2)      |
| Clavicle,            | 9 (3.6)                | 10 (2.2)      |
| Other/unspecified, n | 33 (13.1)              | 56 (12.3)     |

<sup>1</sup> n (%), all such values

<sup>2</sup> further anatomic detail not specified

**Supplemental Table 2: Case characteristics and outcomes by surveillance site of males with Duchenne muscular dystrophy from MD STARnet 2002-2011**

|                                            | <b>CO</b>              | <b>IA</b>  | <b>WNY</b> | <b>AZ</b> | <b>GA</b>  | <b>p</b> |
|--------------------------------------------|------------------------|------------|------------|-----------|------------|----------|
| <b>n</b>                                   | 160                    | 93         | 74         | 170       | 186        |          |
| <b>Age at first visit, y</b>               | 8.9±5.1 <sup>1</sup>   | 8.9±5.8    | 8.9±5.4    | 8.7±5.4   | 7.8±4.1    | 0.22     |
| <b>Age at last visit, y</b>                | 14.7 ± 6.5             | 14.9 ± 6.8 | 15.39±6.3  | 14.54±6.0 | 13.52±5.0  | 0.14     |
| <b>Age at diagnosis, y</b>                 | 4.5±2.8                | 4.2±2.7    | 4.4±3.4    | 4.4±2.8   | 4.8 ±2.8   | 0.59     |
| <b>Glucocorticoid exposure<sup>2</sup></b> | 49 (30.6) <sup>3</sup> | 25 (26.9)  | 17 (23)    | 35 (20.6) | 35 (18.8)  | 0.09     |
| <b>Fracture Ambulatory<sup>4</sup></b>     | 67 (41.9)              | 37 (39.8)  | 37 (50)    | 55 (32.4) | 55 (29.6)  | <0.01    |
| <b>Race</b>                                |                        |            |            |           |            |          |
| White                                      | 86 (53.8)              | 71 (76.3)  | 50 (67.6)  | 73 (42.9) | 117 (62.9) |          |
| Hispanic                                   | 53 (33.1)              | 7 (7.5)    | 4 (5.4)    | 66 (38.8) | 28 (15.1)  | <0.01    |
| Black                                      | 5 (3.1)                | 3 (3.2)    | 6 (8.1)    | 2 (1.2)   | 31 (16.7)  |          |
| Other/Unknown                              | 16 (0.1)               | 12 (12.9)  | 14 (18.9)  | 29 (17.1) | 10 (5.4)   |          |
| <b>DXA Scan</b>                            | 47 (29.3)              | 40 (43)    | 29 (39)    | 24 (14)   | 24 (13)    | <0.01    |
| <b>Spine Xray</b>                          | 89 (55.6)              | 43 (46.2)  | 36 (48.6)  | 92 (54.2) | 112 (60.2) | 0.32     |
| <b>Endocrinologist evaluation</b>          | 6 (3.8)                | 9 (9.7)    | 5 (6.8)    | 4 (2.4)   | 8 (4.3)    | 0.08     |

<sup>1</sup> mean ± SD, all such values

<sup>2</sup> Cumulative use for ≥ six months prior to or during the study period

<sup>3</sup> n (%), all such values

<sup>4</sup> n= 675

Abbreviations: AZ, Arizona; CO, Colorado; GA, Georgia, IA, Iowa, WNY; Western New York
